# Supplementary material
Source: JCI journal article supplement (doi:10.1172/jci202662)
Supplement: sd1 [file 1]

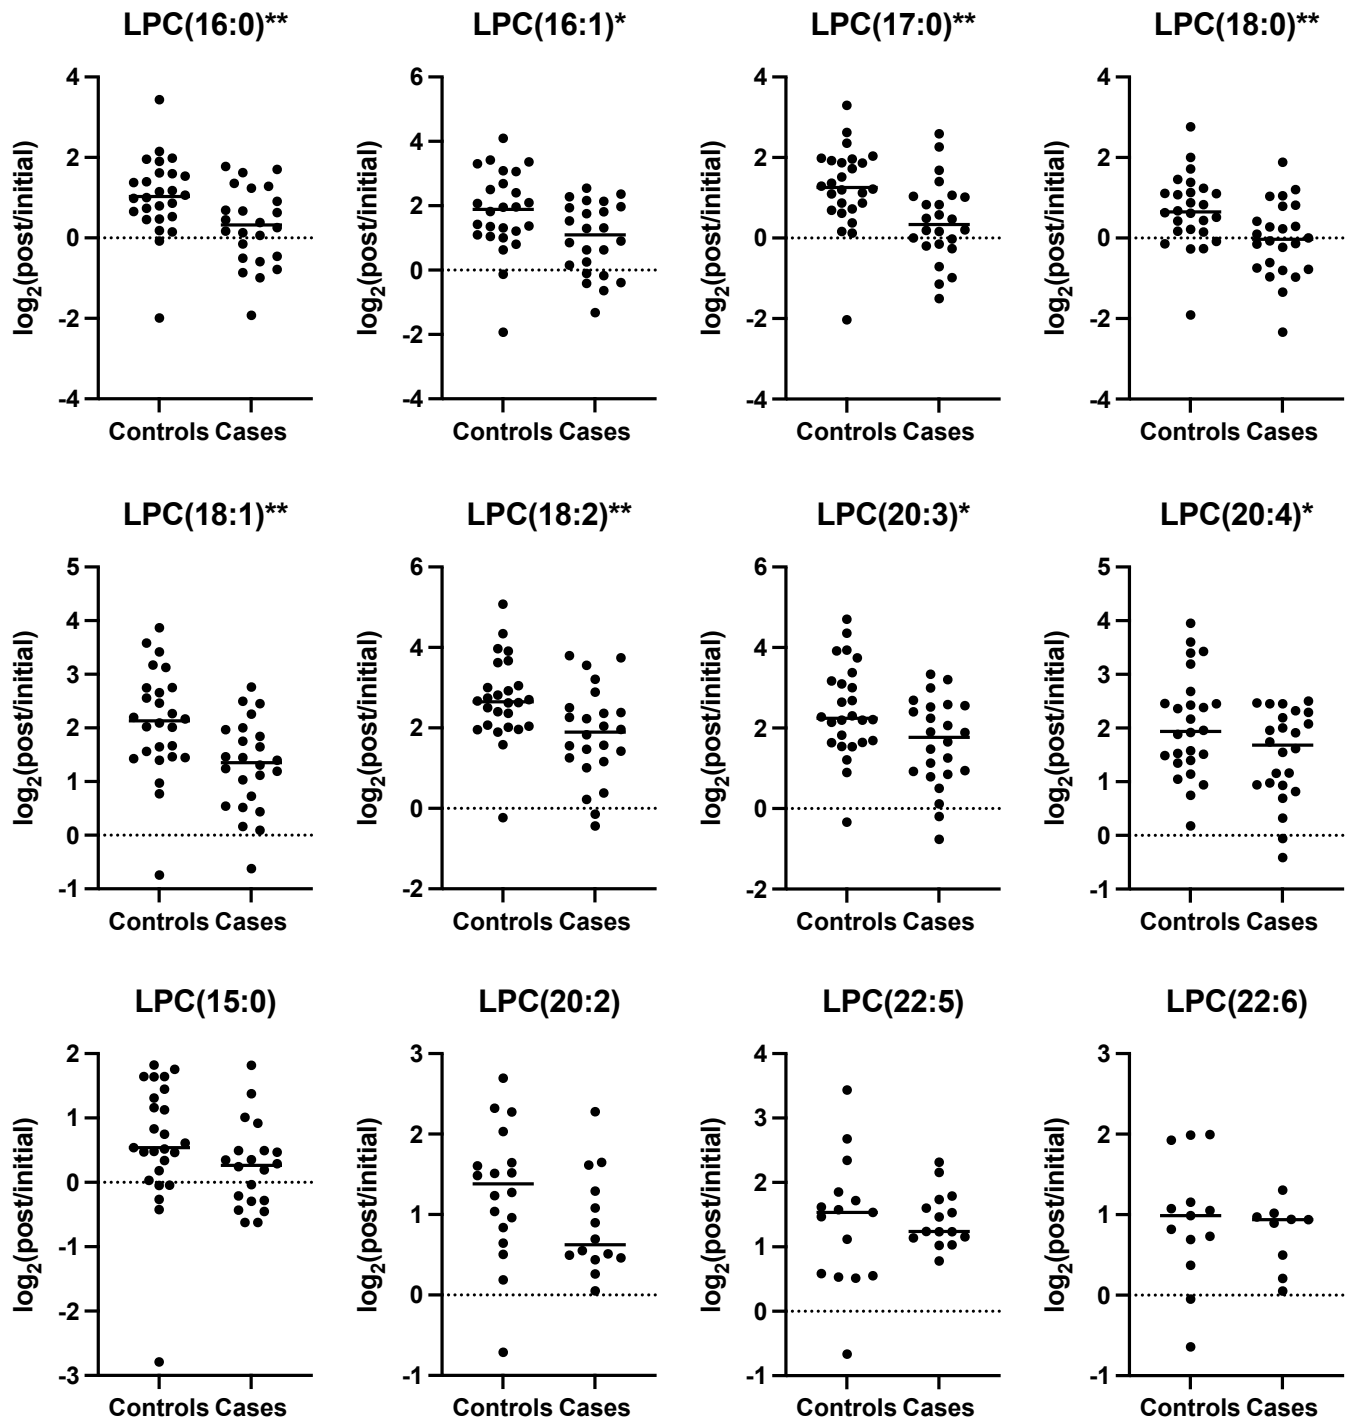

**Supplemental Figure 1. Individual LPC species show attenuated induction-associated increases in AAP cases.**

Eight LPC species exhibit significantly reduced post-induction to initial ratios in cases compared with controls. \*P < 0.05, \*\*P < 0.01; unpaired t test with Welch's correction.

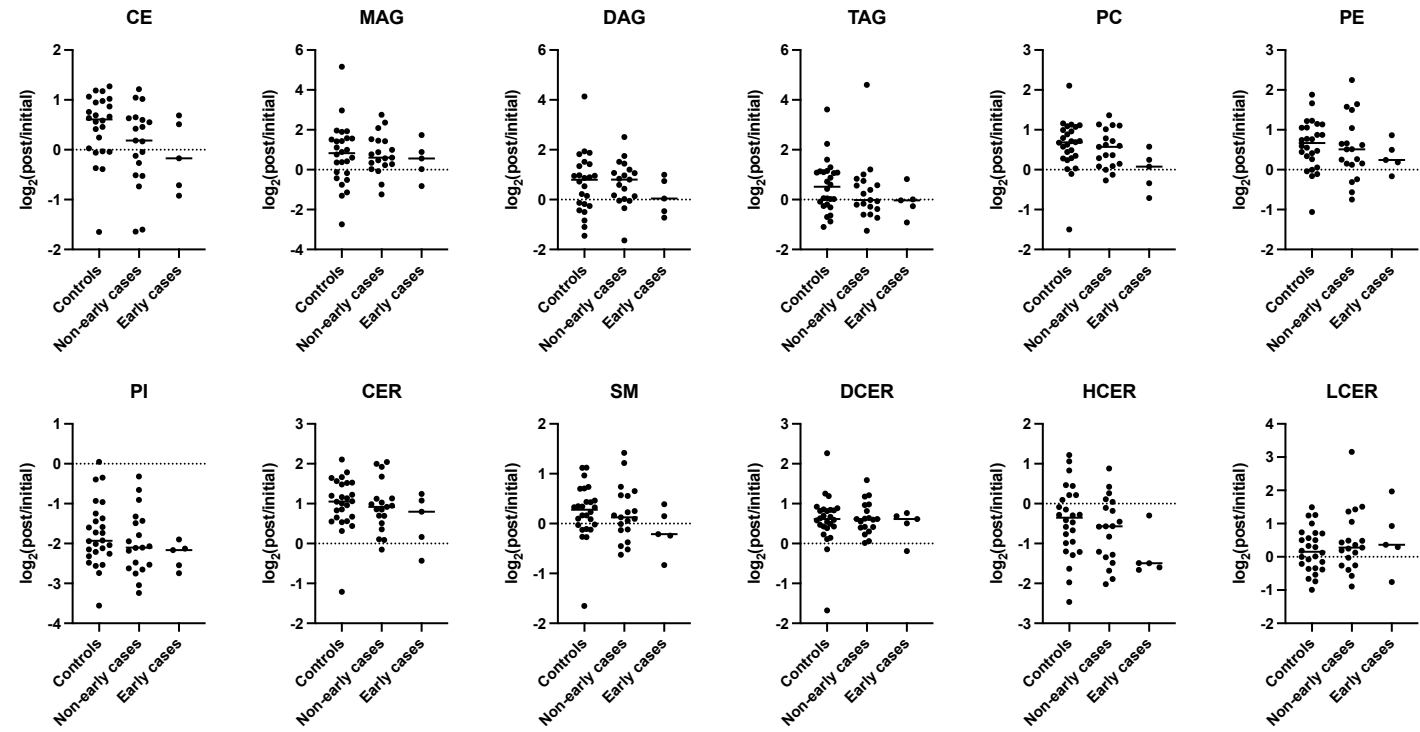

**Supplemental Figure 2. Lipid classes other than LPC and LPE do not show timing-dependent differences.**

Linear trend testing shows no significant differences across controls, non-early cases, and early cases for lipid classes other than LPC and LPE.

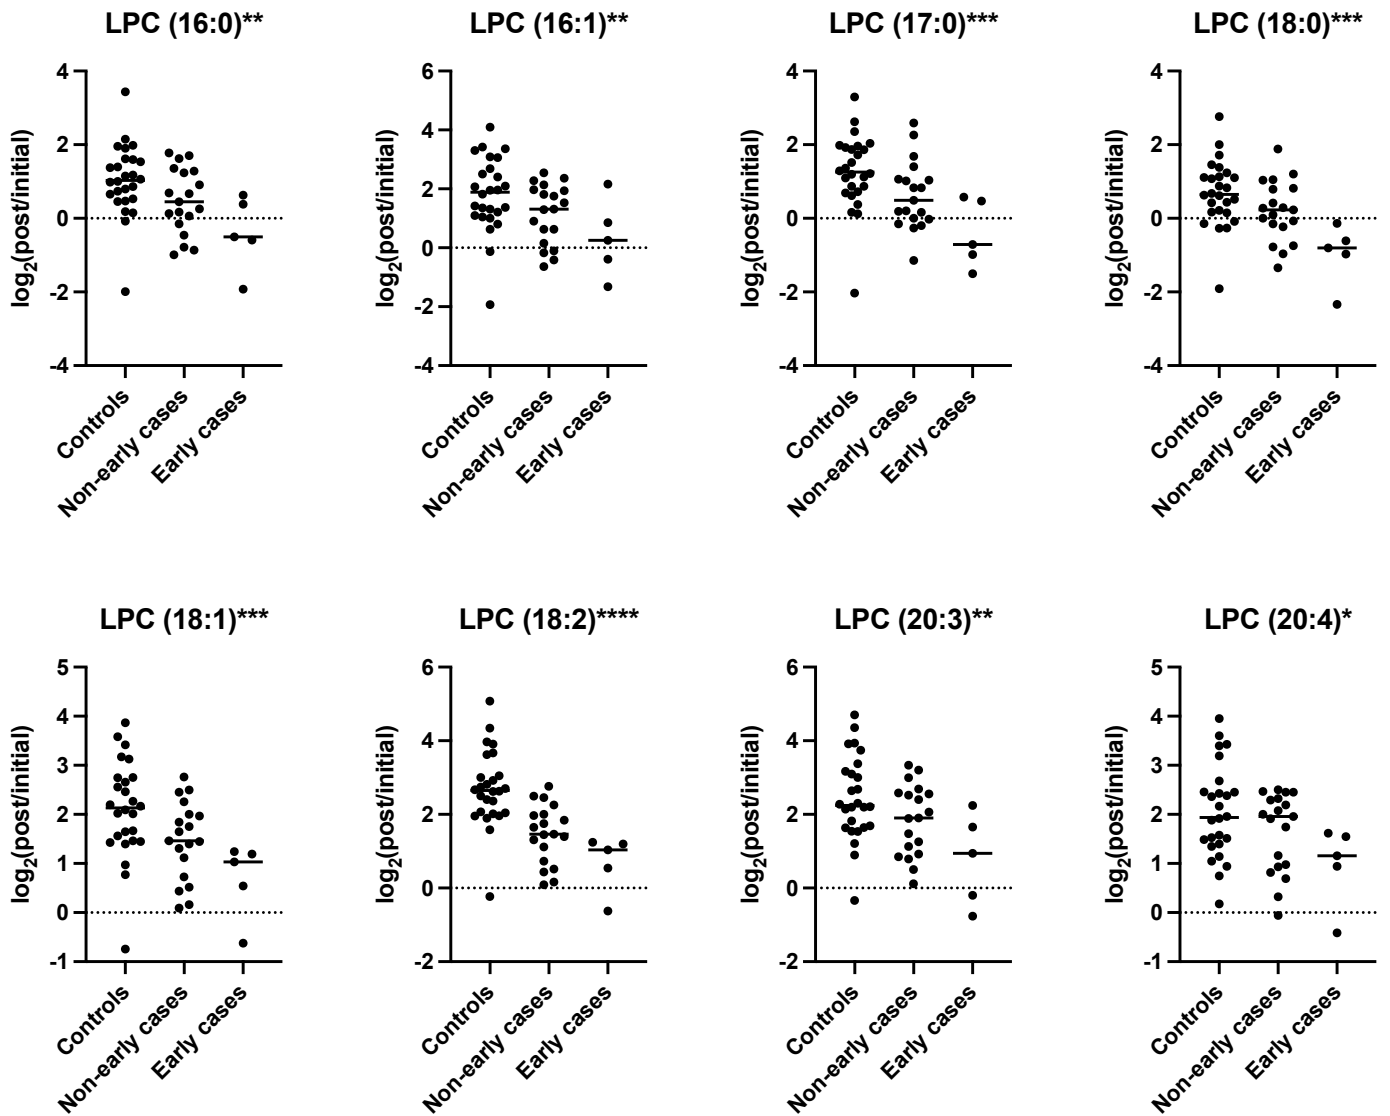

**Supplemental Figure 3. Reduced post/initial LPC ratios in cases across eight LPC species, with the lowest ratios in early cases.**

Post-induction to initial ratios for eight LPC species, stratified by group (controls, non-early cases, early cases). \*\*P < 0.01, \*\*\*P < 0.001, \*\*\*\*P < 0.0001, linear trend test.

## Post-induction

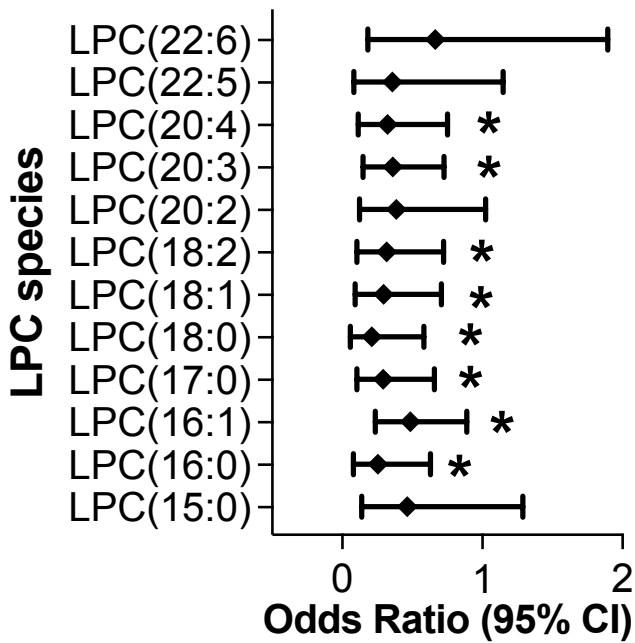

## Post-induction

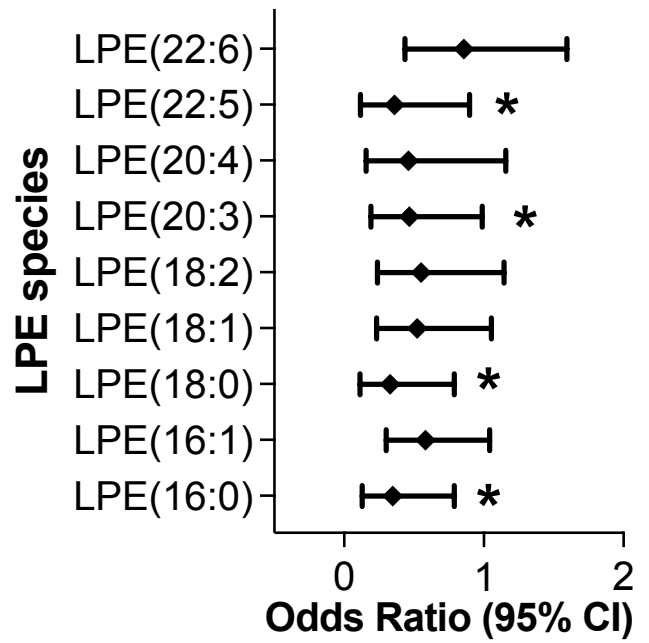

**Supplemental Figure 4. Selected post-induction LPC and LPE species are associations with reduced AAP risk.**

Forest plots display odds ratios (ORs) and 95% confidence intervals (CIs) for AAP per 1-unit increase in  $\log_2$  post-induction lipid concentration for individual LPC (left) and LPE (right) species. \*indicates 95% confidence interval (CI) does not cross 1.

A

Initial

## Composition of the control modules

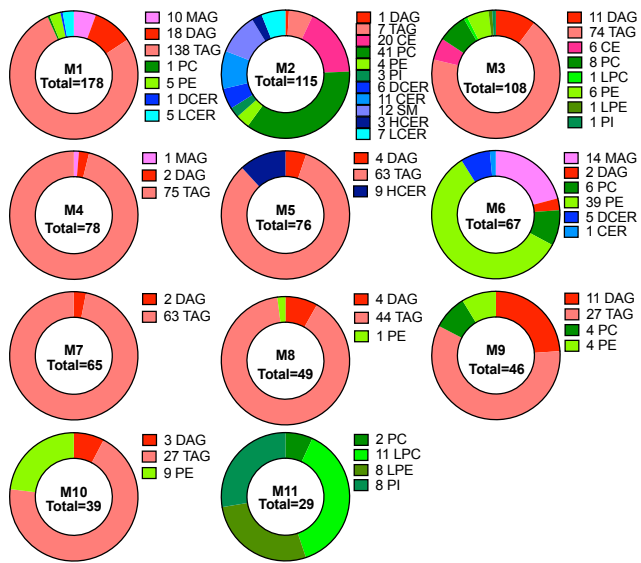

B

Initial

## Module preservation analysis

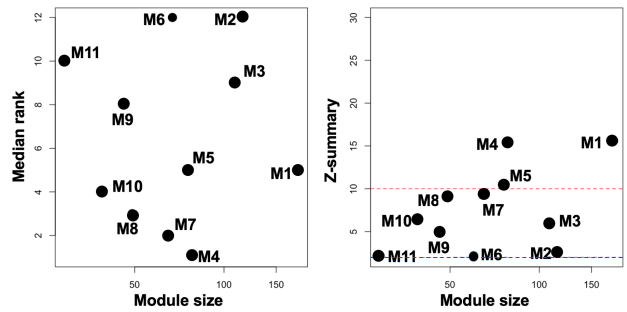

## Supplemental Figure 5. WGCNA identifies non-preserved lipid modules at baseline.

(A) Lipid module composition at the initial timepoint in controls.

(B) Module preservation analysis identifies three non-preserved modules in cases, including one (M11) enriched for LPC species.

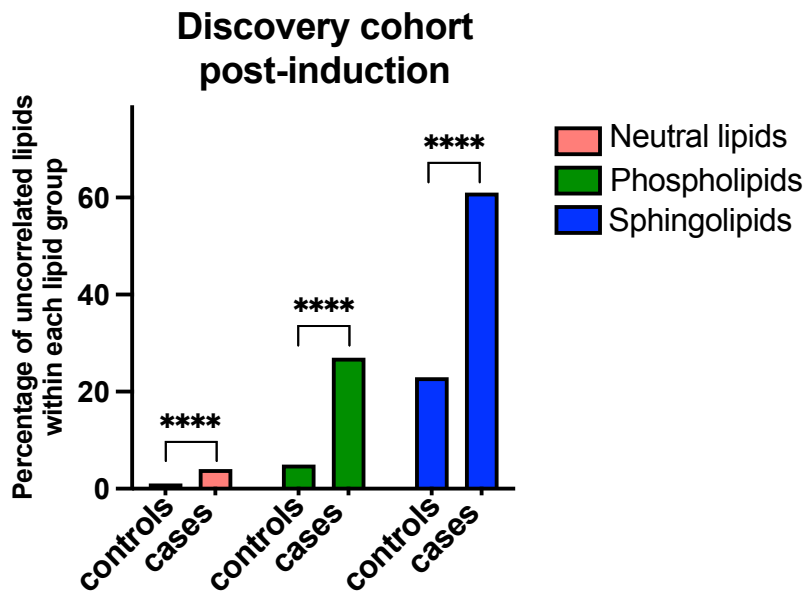

**Supplemental Figure 6. Increased proportion of uncorrelated lipid species in AAP cases post-induction in the discovery cohort.**

Cases exhibit a significantly higher proportion of uncorrelated lipid species compared with controls, consistent with network-level dysregulation. \*\*\*\*P < 0.0001.

## Initial

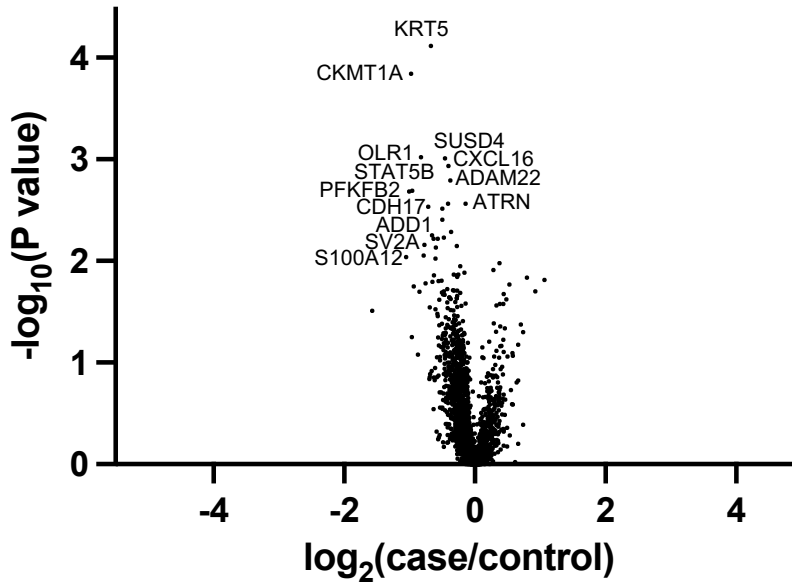

## Post-induction

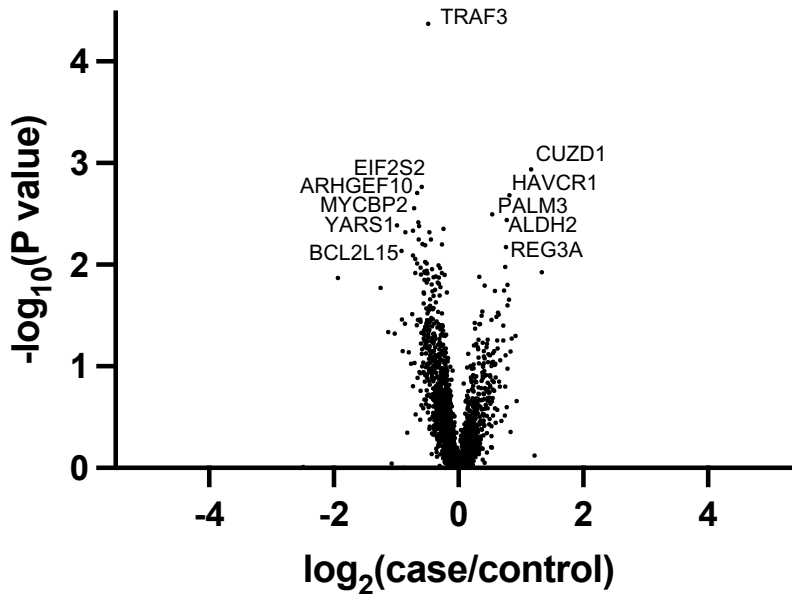

**Supplemental Figure 7. Differential protein expression at baseline and post-induction.**

Volcano plots showing differentially expressed proteins between cases and controls at each timepoint. Only proteins with  $P < 0.01$  were annotated where space allowed.



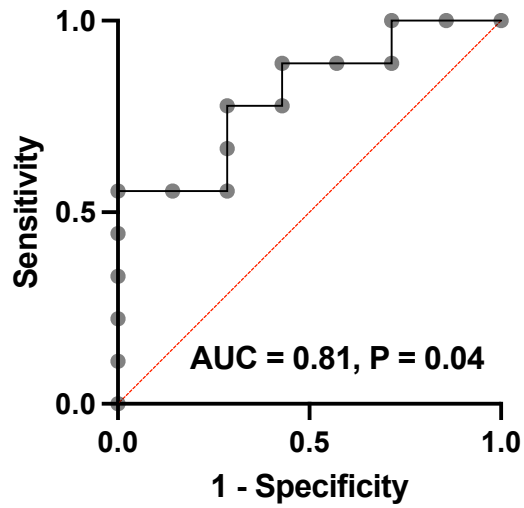

**Supplemental Figure 9. IL-18/LPC(18:0) ratio discriminates AAP risk in very high-risk ALL.**

Receiver operating characteristic analysis demonstrates discriminatory performance of the IL-18/LPC(18:0) ratio within the very high-risk subgroup.

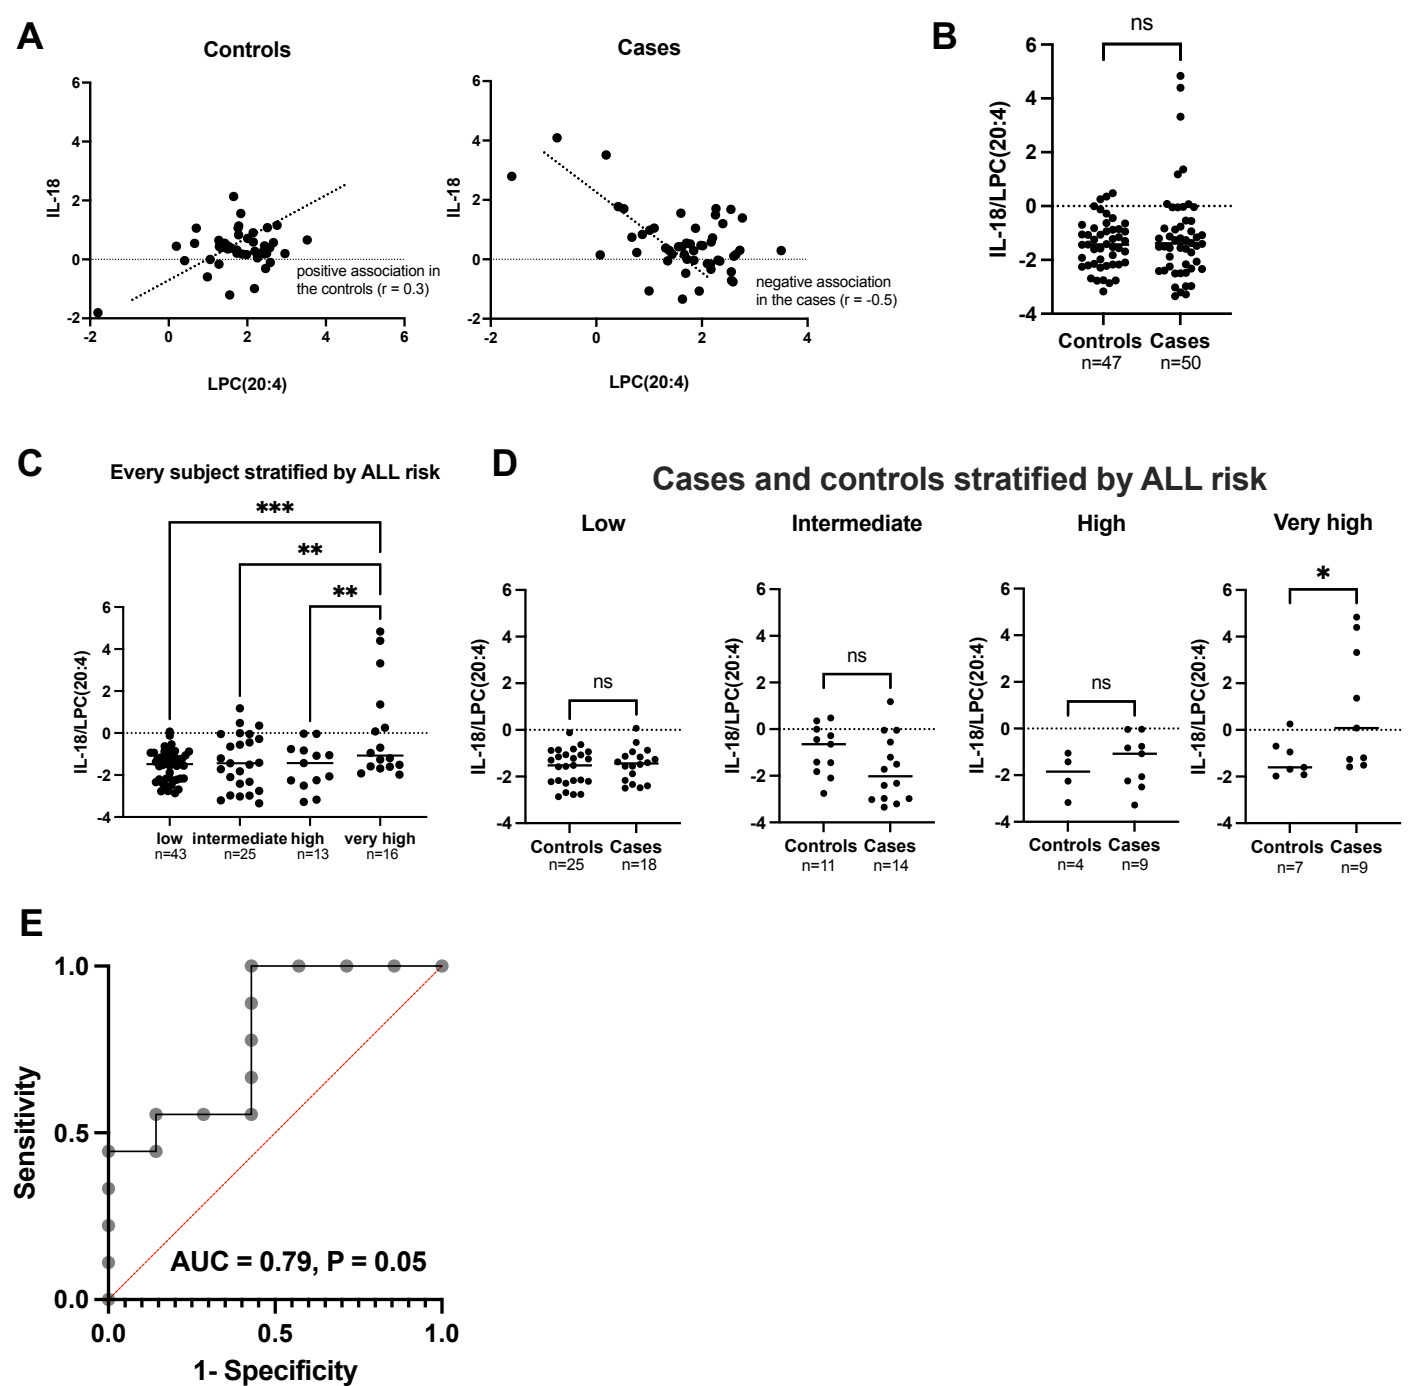

**Fig. S10. Parallel IL-18/LPC(20:4) association patterns mirror LPC(18:0) findings.**

Correlation (A), ratio (B), and stratified analyses (C-E) show similar IL-18–LPC(20:4) dynamics, reinforcing the IL-18/LPC signature.

**Supplemental Table 1. Structural classification of lipids: backbone, head group, and conjugation properties**

| <b>Lipid group</b> | <b>Lipid class</b>                 | <b>Backbone</b> | <b>Head group</b> | <b>Number of conjugated fatty acid</b> | <b>Number of conjugated phosphate</b> |
|--------------------|------------------------------------|-----------------|-------------------|----------------------------------------|---------------------------------------|
| neutral lipid      | monoacylglycerol (MAG)             | glycerol        | NA                | 1                                      | 0                                     |
|                    | diacylglycerol (DAG)               | glycerol        | NA                | 2                                      | 0                                     |
|                    | triacylglycerol (TAG)              | glycerol        | NA                | 3                                      | 0                                     |
|                    | cholesteryl ester (CE)             | sterol          | NA                | 1                                      | 0                                     |
| phospholipid       | phosphatidylcholine (PC)           | glycerol        | choline           | 2                                      | 1                                     |
|                    | lysophosphatidylcholine (LPC)      | glycerol        | choline           | 1                                      | 1                                     |
|                    | phosphatidylethanolamine (PE)      | glycerol        | ethanolamine      | 2                                      | 1                                     |
|                    | lysophosphatidylethanolamine (LPE) | glycerol        | ethanolamine      | 1                                      | 1                                     |
|                    | phosphatidylinositol (PI)          | glycerol        | inositol          | 2                                      | 1                                     |
| sphingolipid       | dihydroceramide (DCER)             | sphinganine     | NA                | 1                                      | 0                                     |
|                    | ceramide (CER)                     | sphingosine     | NA                | 1                                      | 0                                     |
|                    | sphingomyelin (SM)                 | sphingosine     | phosphocholine    | 1                                      | 1                                     |
|                    | hexosylceramide (HCER)             | sphingosine     | hexose            | 1                                      | 0                                     |
|                    | lactosylceramide (LCER)            | sphingosine     | lactose           | 1                                      | 0                                     |

**Supplemental Table 2. Overview of biostatistical methods for data analysis**

| Methods                                                        | Purposes                                                                                                                                                                                                               | Pros                                                                                                                                                                                                                                                                                                                                                                                                                                      | Cons                                                                                                                                          | Figure | Table   |
|----------------------------------------------------------------|------------------------------------------------------------------------------------------------------------------------------------------------------------------------------------------------------------------------|-------------------------------------------------------------------------------------------------------------------------------------------------------------------------------------------------------------------------------------------------------------------------------------------------------------------------------------------------------------------------------------------------------------------------------------------|-----------------------------------------------------------------------------------------------------------------------------------------------|--------|---------|
| Principal Component Analysis (PCA)                             | Exploratory analysis and visualization of lipids on a two-dimensional plot by timepoints and subject groups, using the first two principal components of lipids that explain majority of variation in all lipids.      | Intuitive by plotting the lipids on a two-dimensional plot through dimension deduction for identifying group and time differences, batch effects and outliers; useful for initial examination.                                                                                                                                                                                                                                            | Subjective way to examine the differences between subjects, groups or timepoints; provides limited interpretability.                          | 1E, G, | 3D      |
| Linear mixed-effects regression model                          | Rigorous statistical modeling approach to test lipid expression differences between the subject groups and over time by taking lipids measured at multiple timepoints into account, adjusting for baseline covariates. | Accounts for time, group, and interaction effects in one model.                                                                                                                                                                                                                                                                                                                                                                           | Power may be reduced with small sample sizes, especially in the discovery cohort                                                              | 2A, 4A | S3-4, 9 |
| Class enrichment analysis through one-sided Fisher exact tests | To examine whether the lipid class containing differentially represented lipids are statistically significant enriched.                                                                                                | A rigorous way to examine whether the lipid class contains differentially represented lipids is beyond what would be expected by chance; one-sided tests answer the hypothesis whether the lipid class is enriched with significantly differentially represented lipids ("over representation") compared to two-sided tests which only answer if there is any differences in the number of significant differentially represented lipids. | Require prior hypothesis on the direction of the test when using the one-sided testing approach; lack identification of under representation. | 2B     |         |
| Multivariable logistic regression                              | To examine the effect of lipids on the risk of developing pancreatitis, adjusting for baseline covariates.                                                                                                             | A rigorous parametric regression to examine the association between the covariate and a binary outcome; odds ratio with 95% confidence interval can be obtained with intuitive interpretation for developing pancreatitis.                                                                                                                                                                                                                | Require a moderate sample size especially for rare events.                                                                                    | 2E     |         |

|                                                                  |                                                                                                                          |                                                                                                                                                                                                                                                                                                                                                                                                                                                                                            |                                                                                                                                                                                                                                                                                                             |          |         |
|------------------------------------------------------------------|--------------------------------------------------------------------------------------------------------------------------|--------------------------------------------------------------------------------------------------------------------------------------------------------------------------------------------------------------------------------------------------------------------------------------------------------------------------------------------------------------------------------------------------------------------------------------------------------------------------------------------|-------------------------------------------------------------------------------------------------------------------------------------------------------------------------------------------------------------------------------------------------------------------------------------------------------------|----------|---------|
| WGCNA<br>(weighted gene co-expression network analysis)          | Identify lipid clusters and assess the correlation patterns between subject groups.                                      | It has a rigorous rationale and statistical procedure through weighted correlation and topology to identify the correlation patterns and give information about "whether correlations within lipids are different between two groups". Module eigengene can be further used as a representative of a module to perform more analysis on module level. More rigorous than Spearman rank correlation which can only subjectively see the differences in correlation patterns between groups. | Sensitive to the choice of some parameters (e.g., soft threshold, minimum node size); subjective in determining the unpreserved module as Z-summary is sensitive to the module size and the threshold is subjective, but still more objective than visually comparing Spearman correlations between groups. | 3E-F, S5 | S5-6, 8 |
| Two-sided two-sample proportion test                             | Examine the proportion of lipids uncorrelated with any other modules within each lipid group between cases and controls. | easy interpretation of comparing two proportions in two independent groups; widely used.                                                                                                                                                                                                                                                                                                                                                                                                   | Has size requirements especially requiring larger sample size if the proportion is close to 0 or 1.                                                                                                                                                                                                         | S6       |         |
| Pathway enrichment analysis through one-sided Fisher exact tests | To examine whether the pathway containing differentially expressed proteins are statistically significant enriched.      | A rigorous way to examine whether the pathway containing differentially expressed proteins is beyond what would be expected by chance; one-sided tests answer the hypothesis whether the pathway is enriched with significant differentially expressed proteins("over representation") compared to two-sided tests which only answer if there is any differences in the number of significant differentially expressed proteins.                                                           | Require prior hypothesis on the direction of the test when using the one-sided testing approach; lack identification of under representation.                                                                                                                                                               | 4B       |         |

---

**Supplemental Table 3. Linear mixed-effects regression analysis of lipid class concentrations at initial and post-induction timepoints, and their ratios (post/initial) between cases and controls**

| Lipid group   | Lipid class | Initial |         |         | Post-induction |              |              | Post/initial ratio |              |              |
|---------------|-------------|---------|---------|---------|----------------|--------------|--------------|--------------------|--------------|--------------|
|               |             | tstat   | P value | Q value | tstat          | P value      | Q value      | tstat              | P value      | Q value      |
| neutral lipid | DAG         | 0.814   | 0.661   | 0.993   | -0.459         | 0.876        | 0.876        | -0.056             | 0.955        | 0.970        |
|               | MAG         | -0.108  | 0.993   | 0.993   | -0.476         | 0.867        | 0.876        | 0.038              | 0.970        | 0.970        |
|               | TAG         | -0.287  | 0.949   | 0.993   | -0.666         | 0.757        | 0.876        | -0.868             | 0.390        | 0.682        |
|               | CE          | 0.609   | 0.792   | 0.993   | -1.951         | 0.105        | 0.421        | -2.105             | 0.041        | 0.191        |
| phospholipid  | PC          | 0.505   | 0.851   | 0.988   | -1.757         | 0.16         | 0.26         | -1.045             | 0.302        | 0.604        |
|               | <b>LPC</b>  | 0.696   | 0.738   | 0.988   | -3.584         | <b>0.001</b> | <b>0.005</b> | -2.850             | <b>0.007</b> | <b>0.092</b> |
|               | PE          | -0.140  | 0.988   | 0.988   | -1.363         | 0.321        | 0.402        | -0.544             | 0.589        | 0.750        |
|               | LPE         | -0.412  | 0.899   | 0.988   | -2.384         | <b>0.038</b> | <b>0.095</b> | -2.268             | 0.028        | 0.191        |
|               | PI          | 0.670   | 0.755   | 0.988   | -1.195         | 0.415        | 0.42         | -1.109             | 0.273        | 0.604        |
| sphingolipid  | DCER        | -0.729  | 0.717   | 0.950   | -0.974         | 0.554        | 0.554        | 0.290              | 0.773        | 0.902        |
|               | CER         | -1.106  | 0.469   | 0.950   | -1.863         | 0.127        | 0.318        | -0.717             | 0.477        | 0.743        |
|               | SM          | 0.657   | 0.763   | 0.950   | -1.301         | 0.354        | 0.443        | -0.587             | 0.560        | 0.750        |
|               | HCER        | 0.360   | 0.922   | 0.950   | -1.493         | 0.258        | 0.431        | -1.345             | 0.185        | 0.604        |
|               | LCER        | -0.284  | 0.950   | 0.950   | 2.127          | 0.071        | 0.318        | 1.236              | 0.223        | 0.604        |

tstat: the ratio of the difference in a number's estimated value from its assumed value to its standard error.

**Supplemental Table 4. Differentially presented lipids species identified post-induction (P < 0.05)**

| <b>Lipid group</b>   | <b>Lipid species</b> | <b>log<sub>2</sub>(case/control)</b> | <b>-log(P value)</b> |
|----------------------|----------------------|--------------------------------------|----------------------|
| <b>neutral lipid</b> | DAG(14:0/20:0)       | -0.77                                | 1.60                 |
|                      | TAG54:5-FA18:0       | -0.70                                | 1.44                 |
|                      | TAG54:6-FA18:2       | -0.72                                | 1.43                 |
|                      | TAG54:7-FA18:1       | -0.69                                | 1.48                 |
|                      | TAG54:7-FA18:2       | -0.84                                | 1.62                 |
|                      | TAG54:7-FA18:3       | -0.81                                | 1.61                 |
|                      | TAG54:8-FA18:2       | -0.95                                | 1.97                 |
|                      | TAG54:8-FA18:3       | -0.99                                | 1.85                 |
|                      | TAG55:6-FA20:3       | 0.11                                 | 1.50                 |
|                      | CE(12:0)             | -0.94                                | 1.68                 |
|                      | CE(14:0)             | -0.52                                | 1.44                 |
|                      | CE(15:0)             | -0.54                                | 1.92                 |
|                      | CE(17:0)             | -0.56                                | 1.81                 |
| <b>phospholipid</b>  | PC(14:0/20:3)        | -0.69                                | 2.54                 |
|                      | PC(14:0/20:4)        | -0.40                                | 1.55                 |
|                      | PC(16:0/20:2)        | -0.44                                | 1.84                 |
|                      | PC(16:0/20:3)        | -0.53                                | 1.76                 |
|                      | PC(16:0/20:5)        | -0.85                                | 1.36                 |
|                      | PC(16:0/22:4)        | -0.41                                | 1.45                 |
|                      | PC(16:0/22:5)        | -0.47                                | 1.61                 |
|                      | PC(18:0/20:3)        | -0.47                                | 1.52                 |
|                      | PC(18:0/22:5)        | -0.47                                | 1.86                 |
|                      | PC(18:2/20:3)        | -0.40                                | 1.94                 |
|                      | PC(18:2/20:4)        | -0.32                                | 1.69                 |
|                      | LPC(16:0)            | -0.59                                | 2.89                 |
|                      | LPC(16:1)            | -0.62                                | 1.98                 |
|                      | LPC(17:0)            | -0.66                                | 2.65                 |
|                      | LPC(18:0)            | -0.59                                | 2.67                 |
|                      | LPC(18:1)            | -0.57                                | 2.32                 |
|                      | LPC(18:2)            | -0.54                                | 1.90                 |
|                      | LPC(20:3)            | -0.71                                | 2.62                 |
|                      | LPC(20:4)            | -0.56                                | 2.07                 |
|                      | PE(18:2/16:1)        | -0.52                                | 1.99                 |
|                      | PE(O-18:0/20:3)      | -0.54                                | 1.82                 |
|                      | PE(P-16:0/18:2)      | -0.64                                | 2.23                 |
|                      | PE(P-16:0/20:3)      | -0.76                                | 2.68                 |
|                      | PE(P-18:0/18:2)      | -0.65                                | 2.32                 |
|                      | PE(P-18:0/20:3)      | -0.85                                | 2.67                 |
|                      | PE(P-18:0/20:5)      | -0.93                                | 2.00                 |
|                      | PE(P-18:1/18:2)      | -0.54                                | 1.71                 |
|                      | PE(P-18:1/20:3)      | -0.75                                | 2.18                 |
|                      | LPE(16:0)            | -0.50                                | 2.22                 |
|                      | LPE(18:0)            | -0.51                                | 2.04                 |
|                      | LPE(22:5)            | -0.60                                | 1.34                 |
| PI(18:0/20:3)        | -0.39                | 1.48                                 |                      |
| <b>sphingolipid</b>  | CER(24:0)            | -0.42                                | 1.63                 |
|                      | DCER(22:2)           | -0.70                                | 2.04                 |
|                      | LCER(24:1)           | 1.10                                 | 1.62                 |

In the Metabolon lipid nomenclature system, the letter indicates the lipid class, while the content in parentheses specifies the conjugated fatty acid. The first number represents the number of carbon atoms in the fatty acid chain, and the second number denotes the number of double bonds.

**Supplemental Table 5. Non-preserved lipid species identified at initial in the discovery cohort**

| <b>Lipid group</b> | <b>Lipid Species</b> |
|--------------------|----------------------|
|                    | MAG(14:0)            |
|                    | MAG(16:0)            |
|                    | MAG(17:0)            |
|                    | MAG(18:0)            |
|                    | MAG(18:1)            |
|                    | MAG(18:2)            |
|                    | MAG(18:3)            |
|                    | MAG(20:1)            |
|                    | MAG(20:2)            |
|                    | MAG(20:3)            |
|                    | MAG(20:4)            |
|                    | MAG(22:4)            |
|                    | MAG(22:5)            |
|                    | MAG(22:6)            |
|                    | DAG(16:1/20:0)       |
|                    | DAG(16:1/20:2)       |
|                    | DAG(16:1/22:6)       |
|                    | TAG55:7-FA15:0       |
|                    | TAG58:6-FA16:0       |
|                    | TAG58:7-FA20:4       |
|                    | TAG58:8-FA20:3       |
|                    | TAG58:8-FA20:4       |
| neutral lipid      | TAG58:9-FA20:4       |
|                    | TAG58:10-FA20:4      |
|                    | CE(12:0)             |
|                    | CE(14:0)             |
|                    | CE(14:1)             |
|                    | CE(15:0)             |
|                    | CE(16:0)             |
|                    | CE(16:1)             |
|                    | CE(17:0)             |
|                    | CE(18:0)             |
|                    | CE(18:1)             |
|                    | CE(18:2)             |
|                    | CE(18:3)             |
|                    | CE(18:4)             |
|                    | CE(20:2)             |
|                    | CE(20:3)             |
|                    | CE(20:4)             |
|                    | CE(22:0)             |
|                    | CE(22:1)             |
|                    | CE(22:4)             |
|                    | CE(22:5)             |
|                    | CE(24:1)             |
|                    | PC(14:0/18:1)        |
|                    | PC(14:0/18:2)        |
|                    | PC(14:0/20:3)        |
|                    | PC(14:0/20:4)        |
|                    | PC(15:0/18:1)        |
|                    | PC(15:0/18:2)        |
|                    | PC(16:0/16:0)        |
|                    | PC(16:0/16:1)        |

PC(16:0/18:0)  
PC(16:0/18:1)  
PC(16:0/18:2)  
PC(16:0/20:1)  
PC(16:0/20:2)  
PC(16:0/20:3)  
PC(16:0/20:4)  
PC(16:0/22:4)  
PC(16:0/22:5)  
PC(17:0/18:1)  
PC(17:0/18:2)  
PC(17:0/20:3)  
PC(17:0/20:4)  
PC(18:0/16:1)  
PC(18:0/18:0)  
PC(18:0/18:1)  
PC(18:0/18:2)  
PC(18:0/20:2)  
PC(18:0/20:3)  
PC(18:0/20:4)  
PC(18:0/22:4)  
PC(18:0/22:5)  
PC(18:1/16:1)  
PC(18:1/18:1)  
PC(18:1/18:2)  
PC(18:1/20:2)  
PC(18:1/20:3)  
PC(18:1/20:4)  
PC(18:1/22:4)  
PC(18:1/22:5)  
PC(18:2/16:1)  
PC(18:2/18:2)  
PC(18:2/18:3)  
PC(18:2/20:2)  
PC(18:2/20:3)  
PC(18:2/20:4)  
PC(18:2/22:5)  
PC(20:0/18:1)  
PC(20:0/18:2)  
PC(20:0/20:3)  
PC(20:0/20:4)  
LPC(15:0)  
LPC(16:0)  
LPC(16:1)  
LPC(17:0)  
LPC(18:0)  
LPC(18:1)  
LPC(18:2)  
LPC(20:2)  
LPC(20:3)  
LPC(20:4)  
LPC(22:5)  
PE(18:0/18:0)  
PE(18:0/18:1)  
PE(18:0/20:2)  
PE(18:1/16:1)

phospholipid

PE(18:1/20:4)  
PE(18:1/22:5)  
PE(18:2/16:1)  
PE(O-16:0/18:1)  
PE(O-16:0/18:2)  
PE(O-16:0/20:4)  
PE(O-16:0/22:4)  
PE(O-16:0/22:5)  
PE(O-16:0/22:6)  
PE(O-18:0/18:1)  
PE(O-18:0/18:2)  
PE(O-18:0/20:3)  
PE(O-18:0/20:4)  
PE(O-18:0/22:4)  
PE(O-18:0/22:5)  
PE(O-18:0/22:6)  
PE(P-16:0/18:1)  
PE(P-16:0/18:2)  
PE(P-16:0/20:3)  
PE(P-16:0/20:4)  
PE(P-16:0/22:4)  
PE(P-16:0/22:5)  
PE(P-16:0/22:6)  
PE(P-18:0/16:0)  
PE(P-18:0/18:1)  
PE(P-18:0/18:2)  
PE(P-18:0/20:3)  
PE(P-18:0/20:4)  
PE(P-18:0/22:5)  
PE(P-18:0/22:6)  
PE(P-18:1/16:0)  
PE(P-18:1/18:1)  
PE(P-18:1/18:2)  
PE(P-18:1/20:3)  
PE(P-18:1/20:4)  
PE(P-18:1/22:4)  
PE(P-18:1/22:5)  
PE(P-18:1/22:6)  
PE(P-18:2/20:4)  
LPE(16:0)  
LPE(16:1)  
LPE(18:0)  
LPE(18:1)  
LPE(18:2)  
LPE(20:3)  
LPE(20:4)  
LPE(22:5)  
PI(16:0/18:1)  
PI(16:0/18:2)  
PI(16:0/20:4)  
PI(18:0/16:1)  
PI(18:0/18:1)  
PI(18:0/18:2)  
PI(18:0/20:3)  
PI(18:0/20:4)  
PI(18:1/18:1)

PI(18:1/18:2)

PI(18:1/20:4)

---

DCER(16:0)

DCER(18:0)

DCER(18:1)

DCER(20:0)

DCER(20:1)

DCER(22:0)

DCER(22:1)

DCER(22:2)

DCER(24:0)

DCER(24:1)

DCER(26:1)

CER(14:0)

CER(16:0)

CER(18:0)

CER(18:1)

CER(20:0)

CER(20:1)

CER(22:0)

CER(22:1)

CER(24:0)

CER(24:1)

CER(26:0)

sphingolipid

CER(26:1)

SM(14:0)

SM(16:0)

SM(18:0)

SM(18:1)

SM(20:0)

SM(20:1)

SM(22:0)

SM(22:1)

SM(24:0)

SM(24:1)

SM(26:0)

SM(26:1)

HCER(18:1)

HCER(20:1)

HCER(22:1)

LCER(14:0)

LCER(16:0)

LCER(18:1)

LCER(20:1)

LCER(24:0)

LCER(24:1)

LCER(26:0)

---

**Supplemental Table 6. Uncorrelated lipid species identified post-induction in the discovery cohort**

| Lipid group   | Controls       | Cases         |
|---------------|----------------|---------------|
|               |                | MAG(14:0)     |
|               |                | MAG(14:1)     |
|               |                | MAG(16:1)     |
|               |                | MAG(18:1)     |
|               |                | MAG(20:2)     |
|               |                | MAG(20:3)     |
|               |                | MAG(20:4)     |
|               |                | MAG(20:5)     |
|               |                | MAG(22:4)     |
|               |                | MAG(22:5)     |
|               |                | MAG(24:1)     |
|               | TAG57:9-FA22:6 |               |
|               |                | CE(16:0)      |
|               |                | CE(18:0)      |
| neutral lipid |                | CE(18:1)      |
|               |                | CE(18:3)      |
|               | CE(20:0)       | CE(20:0)      |
|               | CE(20:1)       | CE(20:1)      |
|               |                | CE(20:2)      |
|               |                | CE(20:3)      |
|               |                | CE(20:4)      |
|               |                | CE(22:0)      |
|               |                | CE(22:1)      |
|               | CE(22:2)       | CE(22:2)      |
|               |                | CE(22:4)      |
|               |                | CE(22:5)      |
|               |                | CE(22:6)      |
|               |                | CE(24:0)      |
|               |                | CE(24:1)      |
|               |                | PC(16:0/18:0) |
|               |                | PC(16:0/20:3) |
|               |                | PC(16:0/22:5) |
|               |                | PC(16:0/22:6) |
|               |                | PC(17:0/18:2) |
|               |                | PC(17:0/20:3) |
|               |                | PC(17:0/20:4) |
|               |                | PC(18:0/18:0) |
|               |                | PC(18:0/20:3) |
|               |                | PC(18:0/20:4) |
|               |                | PC(18:0/22:4) |
|               |                | PC(18:0/22:5) |
|               |                | PC(18:0/22:6) |
|               |                | PC(18:1/20:3) |
|               |                | PC(18:1/22:5) |
|               |                | PC(18:2/20:5) |
|               |                | PC(18:2/22:5) |
|               |                | PC(18:2/22:6) |
|               |                | PC(20:0/20:3) |
|               |                | PC(20:0/20:4) |
|               |                | LPC(16:0)     |
|               |                | LPC(16:1)     |
| phospholipid  | LPC(17:0)      | LPC(17:0)     |
|               |                | LPC(18:0)     |

|              |                 |                 |
|--------------|-----------------|-----------------|
|              |                 | LPC(18:1)       |
|              | LPC(18:2)       | LPC(18:2)       |
|              |                 | LPC(20:2)       |
|              |                 | LPC(20:3)       |
|              |                 | LPC(20:4)       |
|              |                 | LPC(22:5)       |
|              |                 | LPC(22:6)       |
|              |                 | PE(18:1/22:0)   |
|              |                 | PE(O-16:0/22:6) |
|              |                 | PE(O-18:0/22:6) |
|              | PE(P-16:0/22:6) | PE(P-16:0/22:6) |
|              | PE(P-18:0/20:5) |                 |
|              | PE(P-18:0/22:6) | PE(P-18:0/22:6) |
|              | PE(P-18:1/22:6) | PE(P-18:1/22:6) |
|              | LPE(18:2)       | LPE(18:2)       |
|              |                 | LPE(20:3)       |
|              |                 | LPE(20:4)       |
|              |                 | LPE(22:5)       |
|              |                 | LPE(22:6)       |
|              |                 | PI(18:0/18:2)   |
|              |                 | PI(18:0/20:3)   |
|              | PI(18:0/20:4)   | PI(18:0/20:4)   |
| <hr/>        |                 |                 |
|              |                 | DCER(18:0)      |
|              |                 | DCER(18:1)      |
|              |                 | DCER(20:0)      |
|              |                 | DCER(20:1)      |
|              |                 | DCER(22:0)      |
|              |                 | DCER(22:2)      |
|              |                 | DCER(24:0)      |
|              |                 | DCER(24:1)      |
|              | DCER(26:0)      | DCER(26:0)      |
|              |                 | CER(18:0)       |
|              |                 | CER(18:1)       |
|              |                 | CER(20:0)       |
|              |                 | CER(20:1)       |
|              |                 | CER(22:0)       |
|              |                 | CER(22:1)       |
|              |                 | CER(24:0)       |
|              |                 | SM(16:0)        |
|              | SM(18:0)        | SM(18:0)        |
|              | SM(18:1)        | SM(18:1)        |
|              |                 | SM(20:0)        |
| sphingolipid | SM(20:1)        | SM(20:1)        |
|              |                 | SM(22:0)        |
|              | SM(22:1)        | SM(22:1)        |
|              | SM(24:0)        | SM(24:0)        |
|              |                 | SM(24:1)        |
|              | SM(26:0)        |                 |
|              | SM(26:1)        |                 |
|              |                 | HCER(14:0)      |
|              |                 | HCER(16:0)      |
|              |                 | HCER(18:0)      |
|              |                 | HCER(18:1)      |
|              |                 | HCER(20:0)      |
|              |                 | HCER(20:1)      |
|              |                 | HCER(22:0)      |

|            |            |
|------------|------------|
|            | HCER(22:1) |
|            | HCER(24:0) |
|            | HCER(24:1) |
| LCER(16:0) | LCER(16:0) |
| LCER(18:1) |            |
| LCER(22:0) |            |
| LCER(24:0) |            |
| LCER(24:1) | LCER(24:1) |
| LCER(26:1) |            |

---

**Supplemental Table 7. 814 lipid species overlap between discovery and validation cohorts**

| <b>Lipid group (# species, %)</b> | <b>Lipid class (# species, %)</b> |
|-----------------------------------|-----------------------------------|
| neutral lipids (627, 77.0)        | MAG (25, 3.1)                     |
|                                   | DAG (58, 7.1)                     |
|                                   | TAG (518, 63.6)                   |
|                                   | CE (26, 3.2)                      |
| phospholipids (128, 15.7)         | PC (59, 7.2)                      |
|                                   | LPC (11, 1.4)                     |
|                                   | PE (48, 5.9)                      |
|                                   | LPE (8, 1.0)                      |
|                                   | PI (2, 0.2)                       |
| sphingolipids (59, 7.3)           | DCER (13, 1.6)                    |
|                                   | CER (12, 1.5)                     |
|                                   | SM (12, 1.5)                      |
|                                   | HCER (12, 1.5)                    |
|                                   | LCER, (10, 1.2)                   |

**Supplemental Table 8. Non-preserved lipid species identified at post-induction in the validation cohort**

---

neutral lipid

MAG(18:4)  
CE(12:0)  
CE(14:0)  
CE(14:1)  
CE(15:0)  
CE(16:0)  
CE(16:1)  
CE(17:0)  
CE(18:0)  
CE(18:1)  
CE(18:2)  
CE(18:3)  
CE(18:4)  
CE(20:2)  
CE(20:3)  
CE(20:4)  
CE(20:5)  
CE(22:0)  
CE(22:4)  
CE(22:5)

---

PC(14:0/18:1)  
PC(14:0/18:2)  
PC(14:0/20:3)  
PC(14:0/20:4)  
PC(15:0/18:1)  
PC(15:0/18:2)  
PC(16:0/18:2)  
PC(16:0/20:1)  
PC(16:0/20:4)  
PC(16:0/20:5)  
PC(16:0/22:4)  
PC(16:0/22:5)  
PC(17:0/18:1)  
PC(17:0/18:2)  
PC(17:0/20:3)  
PC(17:0/20:4)  
PC(18:0/18:2)  
PC(18:0/20:4)  
PC(18:0/20:5)  
PC(18:0/22:4)  
PC(18:0/22:5)  
PC(18:1/18:2)  
PC(18:1/18:3)  
PC(18:1/20:4)  
PC(18:1/20:5)  
PC(18:1/22:4)  
PC(18:1/22:5)  
PC(18:2/16:1)  
PC(18:2/18:2)  
PC(18:2/18:3)  
PC(18:2/20:3)  
PC(18:2/20:4)

phospholipid

PC(20:0/18:2)  
PC(20:0/20:4)  
LPC(15:0)  
LPC(16:0)  
LPC(16:1)  
LPC(17:0)  
LPC(18:0)  
LPC(18:1)  
LPC(18:2)  
LPC(20:2)  
LPC(20:3)  
LPC(20:4)  
LPC(22:5)  
PE(O-16:0/22:5)  
PE(O-18:0/20:4)  
PE(O-18:0/22:5)  
PE(P-16:0/18:1)  
PE(P-16:0/18:2)  
PE(P-16:0/20:3)  
PE(P-16:0/20:4)  
PE(P-16:0/22:4)  
PE(P-16:0/22:5)  
PE(P-18:0/18:1)  
PE(P-18:0/18:2)  
PE(P-18:0/20:3)  
PE(P-18:0/20:4)  
PE(P-18:0/22:4)  
PE(P-18:0/22:5)  
PE(P-18:1/18:1)  
PE(P-18:1/18:2)  
PE(P-18:1/20:3)  
PE(P-18:1/20:4)  
PE(P-18:1/22:5)  
LPE(16:0)  
LPE(18:0)  
LPE(18:1)  
LPE(22:5)  
PI(18:0/20:4)

---

sphingolipid

DCER(24:0)  
CER(24:0)  
CER(26:0)  
SM(14:0)  
SM(16:0)  
SM(20:0)  
SM(20:1)  
SM(22:0)  
SM(22:1)  
SM(24:0)  
SM(26:0)  
SM(26:1)  
HCER(14:0)  
HCER(16:0)  
HCER(18:0)  
HCER(20:0)  
HCER(22:0)  
HCER(24:0)

HCER(24:1) ;;  
LCER(18:1)  
LCER(20:1)

---

Lipid species labeled in black were within the non-preserved module (M2), while those labeled in blue were within the modestly non-preserved module (M6).

**Supplemental Table 9. Differentially expressed proteins (P < 0.05) in cases and controls across three sampling conditions**

| Initial  | Post-induction     | Post/Initial          |
|----------|--------------------|-----------------------|
| ACYP1    | AARSD1             | ACE2                  |
| ADAM22   | ACAN               | ADAMTS4               |
| ADAMTS1  | ACE2               | ADAMTSL2              |
| ADD1     | ACYP1              | APCS                  |
| ANXA1    | AK1                | ARHGEF10              |
| APCS     | ALDH2              | ARTN                  |
| APOA1    | ALDH5A1            | ATP1B3                |
| APOB     | AMPD3              | BRK1                  |
| APOD     | ANXA1              | C1QTNF1               |
| ARHGEF1  | ANXA11             | C1QTNF5               |
| ASRGL1   | ANXA3              | C1S                   |
| ATP1B3   | APRT               | CABP2                 |
| AZU1     | ARHGEF1            | CBS                   |
| BRAP     | ARHGEF10           | CCL19                 |
| BRDT     | ARHGEF12           | CCN4                  |
| BRK1     | ATXN3              | CCN5                  |
| CDH17    | BCL2L15            | CDH4                  |
| CEACAM21 | BLVRB              | CEACAM5               |
| CFB      | CA3                | CFB                   |
| CKMT1A   | CALCOCO1           | CFHR5                 |
| CKMT1B   | CC2D1A             | CKMT1A                |
| CLU      | CCL20              | CKMT1B                |
| CNST     | CCS                | COL18A1               |
| CSPG4    | CCT5               | COL3A1                |
| CST6     | CD300LG            | COL4A1                |
| CTHRC1   | CDH17              | CPXM2                 |
| CTSD     | CEACAM5            | CRX                   |
| CXCL16   | CEP85              | CSF3                  |
| DKK3     | CHAC2              | CSRP3                 |
| DLK1     | CHMP1A             | CUZD1                 |
| DNAJB2   | CRADD              | CXADR                 |
| DPP7     | CRYGD              | CXCL17                |
| DSG3     | CSF2               | CXCL8_Cardiometabolic |
| DTX3     | CSF2RB             | CXCL8_Inflammation    |
| EFNB2    | CTSE               | CXCL8_Neurology       |
| EIF2AK2  | CUZD1              | CXCL8_Oncology        |
| ENO2     | CXCL13             | DUOX2                 |
| EPHB6    | CXCL8_Inflammation | ECHS1                 |
| F13B     | CXCL8_Oncology     | EDN1                  |
| FGF19    | DARS1              | EFNB2                 |
| FGFBP1   | DCTN1              | EIF5                  |
| GBP1     | DGKA               | FOXO1                 |

|                    |          |                      |
|--------------------|----------|----------------------|
| GFRA3              | DNAJB1   | GCLM                 |
| GPHA2              | DNAJB2   | HLA-E                |
| HSPG2              | DPP7     | ICAM2                |
| HYAL1              | DSG3     | IFNAR1               |
| ICAM2              | DTYMK    | IGFL4                |
| ICAM5              | ECHS1    | IGSF3                |
| IFNAR1             | EIF2AK2  | IL-18R1              |
| IL-17D             | EIF2S2   | IL-32                |
| IPCEF1             | EIF4E    | IL-6_Cardiometabolic |
| KIRREL2            | ENOX2    | IL-6_Inflammation    |
| KRT5               | ENPP5    | IL-6_Neurology       |
| LCN15              | ENPP6    | IL-6_Oncology        |
| LEG1               | EPHA1    | ITGB1BP1             |
| LGALS3             | EPHX2    | KRT18                |
| LGMN               | EVI5     | KRT5                 |
| LILRA4             | FARSA    | LAMB1                |
| LPA                | FCGR2A   | LBP                  |
| LRG1               | FCRLB    | LEG1                 |
| LTB                | FGFBP1   | LPA                  |
| LY9                | GAST     | LRG1                 |
| LZTFL1             | GCLM     | LY9                  |
| MBL2               | GGCT     | LYPD8                |
| MFAP5              | GKN1     | MBL2                 |
| MRPL58             | GLRX     | MMP10                |
| MUC16              | GMPR     | NEDD9                |
| MYCBP2             | HAVCR1   | NPTN                 |
| NDRG1              | ICA1     | NPTX2                |
| NOP56              | IKBKG    | NUB1                 |
| NPTXR              | IL-10    | PAFAH2               |
| NTRK2              | INPP5D   | PALM3                |
| OLR1               | IRAK4    | PGA4                 |
| PDE5A              | KIAA0319 | PLA2G2A              |
| PFKFB2             | KLK13    | PPIE                 |
| PLA2G4A            | KLK8     | PRR4                 |
| PPP1R12A           | LARP1    | PTPRK                |
| PTH                | LRTM2    | PTPRM                |
| PTPRK              | LYPLA2   | PVR                  |
| PTPRN2             | LZTFL1   | REG3A                |
| PZP                | MFAP3L   | RELT                 |
| RELT               | MNDA     | RGL2                 |
| RGMA               | MYCBP2   | S100A13              |
| RNASE4             | NCF2     | SAA4                 |
| S100A12            | NFE2     | SCIN                 |
| SAA4               | NFKB1    | SCT                  |
| SCRIB_Neurology_II | NOP56    | SERPINA7             |

SCT  
SLAMF1  
SLITRK1  
SPON1  
SRP14  
STAT5B  
SUSD4  
SV2A  
TCP11  
TET2  
THBS4  
TIGAR  
TIGIT  
TNR  
TPD52L2  
TPP1  
TRIM40  
TSC1  
UNC5D  
VASP  
WFIKKN1

NPTN  
NPTXR  
NRTN  
NT5C3A  
NTRK2  
OTUD6B  
PALM3  
PDAP1  
PDE5A  
PFKFB2  
PIK3AP1  
PLA2G2A  
PLPBP  
PPP1R12A  
PPP1R2  
PRKRA  
PSAPL1  
PTRHD1  
RAB44  
RASSF2  
REG3A  
RSPO1  
RSPO3  
S100A4  
SAMD9L  
SDHB  
SERPINI2  
SFRP1  
SH3GLB2  
SHBG  
SKAP1  
SLITRK1  
SNX9  
SPINK4  
SPOCK1  
STAMBP  
STAT5B  
TANK  
TAX1BP1  
TBC1D17  
TBCA  
TBCC  
TNFSF12  
TNIP1  
TOP2B

SFRP4  
SOWAHA  
SPON2  
SRPX  
SUSD4  
TCP11  
TIGIT  
TNFRSF6B  
TNFRSF8  
TRIM25  
TRIM40  
TSPAN1  
TSPAN7  
VMO1  
VWA1  
WFIKKN1

TRAF3  
TRIM25  
TSPAN1  
TXN  
TXNDC9  
UNC5D  
USP25  
VASP  
VTA1  
YARS1

---

**Supplemental Table 10. Top 10 significant enriched pathways identified in proteomics**

| <b>Pathway</b>                                                   | <b>Number of total proteins within the pathway</b> | <b>Number of significant differentially expressed proteins within the pathway</b> | <b>P value</b> | <b>Q value</b> |
|------------------------------------------------------------------|----------------------------------------------------|-----------------------------------------------------------------------------------|----------------|----------------|
| Senescence-Associated Secretory Phenotype (SASP)                 | 17                                                 | 8                                                                                 | 8.15E-08       | 0.00017        |
| Interleukin-10 signaling                                         | 42                                                 | 10                                                                                | 3.17E-06       | 0.00326        |
| Cellular Senescence                                              | 28                                                 | 8                                                                                 | 7.15E-06       | 0.00490        |
| MAPK1 (ERK2) activation                                          | 6                                                  | 4                                                                                 | 3.04E-05       | 0.01249        |
| Interleukin-6 signaling                                          | 6                                                  | 4                                                                                 | 3.04E-05       | 0.01249        |
| Interleukin-4 and Interleukin-13 signaling                       | 57                                                 | 10                                                                                | 5.53E-05       | 0.01893        |
| RAF-independent MAPK1/3 activation                               | 8                                                  | 4                                                                                 | 1.33E-04       | 0.02740        |
| MAPK3 (ERK1) activation                                          | 8                                                  | 4                                                                                 | 1.33E-04       | 0.02740        |
| CD163 mediating an anti-inflammatory response                    | 8                                                  | 4                                                                                 | 1.33E-04       | 0.02740        |
| ATF4 activates genes in response to endoplasmic reticulum stress | 8                                                  | 4                                                                                 | 1.33E-04       | 0.02740        |

**Supplemental Table 11. List of  
LPC species and cytokines  
included in the association**

| <b>LPC species</b> | <b>Cytokine</b>       |
|--------------------|-----------------------|
| LPC(16:0)          | CCL2                  |
| LPC(16:1)          | CCL3                  |
| LPC(17:0)          | CCL4                  |
| LPC(18:0)          | CCL5                  |
| LPC(18:1)          | CCL7                  |
| LPC(18:2)          | CCL8                  |
| LPC(20:3)          | CCL11                 |
| LPC(20:4)          | CCL13                 |
|                    | CCL14                 |
|                    | CCL15                 |
|                    | CCL16                 |
|                    | CCL17                 |
|                    | CCL18                 |
|                    | CCL19                 |
|                    | CCL20                 |
|                    | CCL21                 |
|                    | CCL22                 |
|                    | CCL23                 |
|                    | CCL24                 |
|                    | CCL25                 |
|                    | CCL26                 |
|                    | CCL27                 |
|                    | CCL28                 |
|                    | CSF1                  |
|                    | CSF2                  |
|                    | CSF3                  |
|                    | CX3CL1                |
|                    | CXCL1                 |
|                    | CXCL3                 |
|                    | CXCL5                 |
|                    | CXCL6                 |
|                    | CXCL10                |
|                    | CXCL11                |
|                    | CXCL12                |
|                    | CXCL13                |
|                    | CXCL14                |
|                    | CXCL16                |
|                    | CXCL17                |
|                    | CXCL8-cardiometabolic |
|                    | CXCL8-inflammation    |
|                    | CXCL8-neurology       |
|                    | CXCL8-oncology        |
|                    | CXCL9                 |
|                    | CYTL1                 |
|                    | FLT3LG                |
|                    | IFNG                  |
|                    | IFNL1                 |
|                    | IFNL2                 |
|                    | IFNW1                 |
|                    | IL-1A                 |
|                    | IL-1B                 |
|                    | IL-1RN                |

IL-2  
IL-3  
IL-4  
IL-5  
IL-6-cardiometabolic  
IL-6-inflammation  
IL-6-neurology  
IL-6-oncology  
IL-7  
IL-9  
IL-10  
IL-11  
IL-12A\_IL-12B  
IL-12B  
IL-13  
IL-15  
IL-16  
IL-17A  
IL-17C  
IL-17D  
IL-17F  
IL-18  
IL-19  
IL-20  
IL-22  
IL-24  
IL-25  
IL-27A  
IL-31  
IL-32  
IL-33  
IL-34  
IL-36A  
IL-36G  
LECT2  
LIF  
OSM  
PF4  
PPBP  
SCGB1A1  
SPP1  
TFAF5  
TGFB1  
TGFB2  
TNF-cardiometabolic  
TNF-inflammation  
TNF-neurology  
TNF-oncology  
TNFSF8  
TNFSF9  
TNFSF10  
TNFSF11  
TNFSF12  
TNFSF13  
TNFSF13B  
TNFSF14

## XCL1

---

CXCL8, IL-6 and TNF were measured in 4 different panels and are considered distinct proteins.

**Supplemental Table 12. Baseline characteristics of 16 subjects with VHR ALL**

|                              | <b>Controls</b> |          |                       | <b>AAP cases</b> |          |                       |
|------------------------------|-----------------|----------|-----------------------|------------------|----------|-----------------------|
|                              | <b>N</b>        | <b>%</b> | <b>Median (range)</b> | <b>N</b>         | <b>%</b> | <b>Median (range)</b> |
| <b>Total no. of subjects</b> | 7               |          |                       | 9                |          |                       |
| <b>Age at diagnosis, y</b>   |                 |          | 8 (1~15)              |                  |          | 6 (1 ~15)             |
| 1 ~ 10                       | 5               | 71.4     |                       | 7                | 77.8     |                       |
| 10 ~ 15                      | 2               | 28.6     |                       | 2                | 22.2     |                       |
| <b>Sex</b>                   |                 |          |                       |                  |          |                       |
| Female                       | 2               | 28.6     |                       | 4                | 44.4     |                       |
| Male                         | 5               | 71.4     |                       | 5                | 55.6     |                       |
